# Supplementary material
Source: PubMed Central journal article supplement (PMC1939978)
Supplement: NIHMS25552-supplement-01.pdf [file NIHMS25552-supplement-01.pdf]

**Transactivation of miR-34a by p53 broadly influences gene expression and promotes apoptosis**

**Supplemental Material**

Tsung-Cheng Chang<sup>1,5</sup>, Erik A. Wentzel<sup>1,5</sup>, Oliver A. Kent<sup>1</sup>, Kalyani Ramachandran<sup>1</sup>, Michael Mullendore<sup>2</sup>, Kwang Hyuck Lee<sup>2</sup>, Georg Feldmann<sup>2</sup>, Munekazu Yamakuchi<sup>4</sup>, Marcella Ferlito<sup>4</sup>, Charles J. Lowenstein<sup>3,4</sup>, Dan E. Arking<sup>1</sup>, Michael A. Beer<sup>1</sup>, Anirban Maitra<sup>1,2,3</sup>, and Joshua T. Mendell<sup>1\*</sup>

**Contents:**

**Supplemental Figures 1-3**  
**Supplemental Tables 1 and 3**

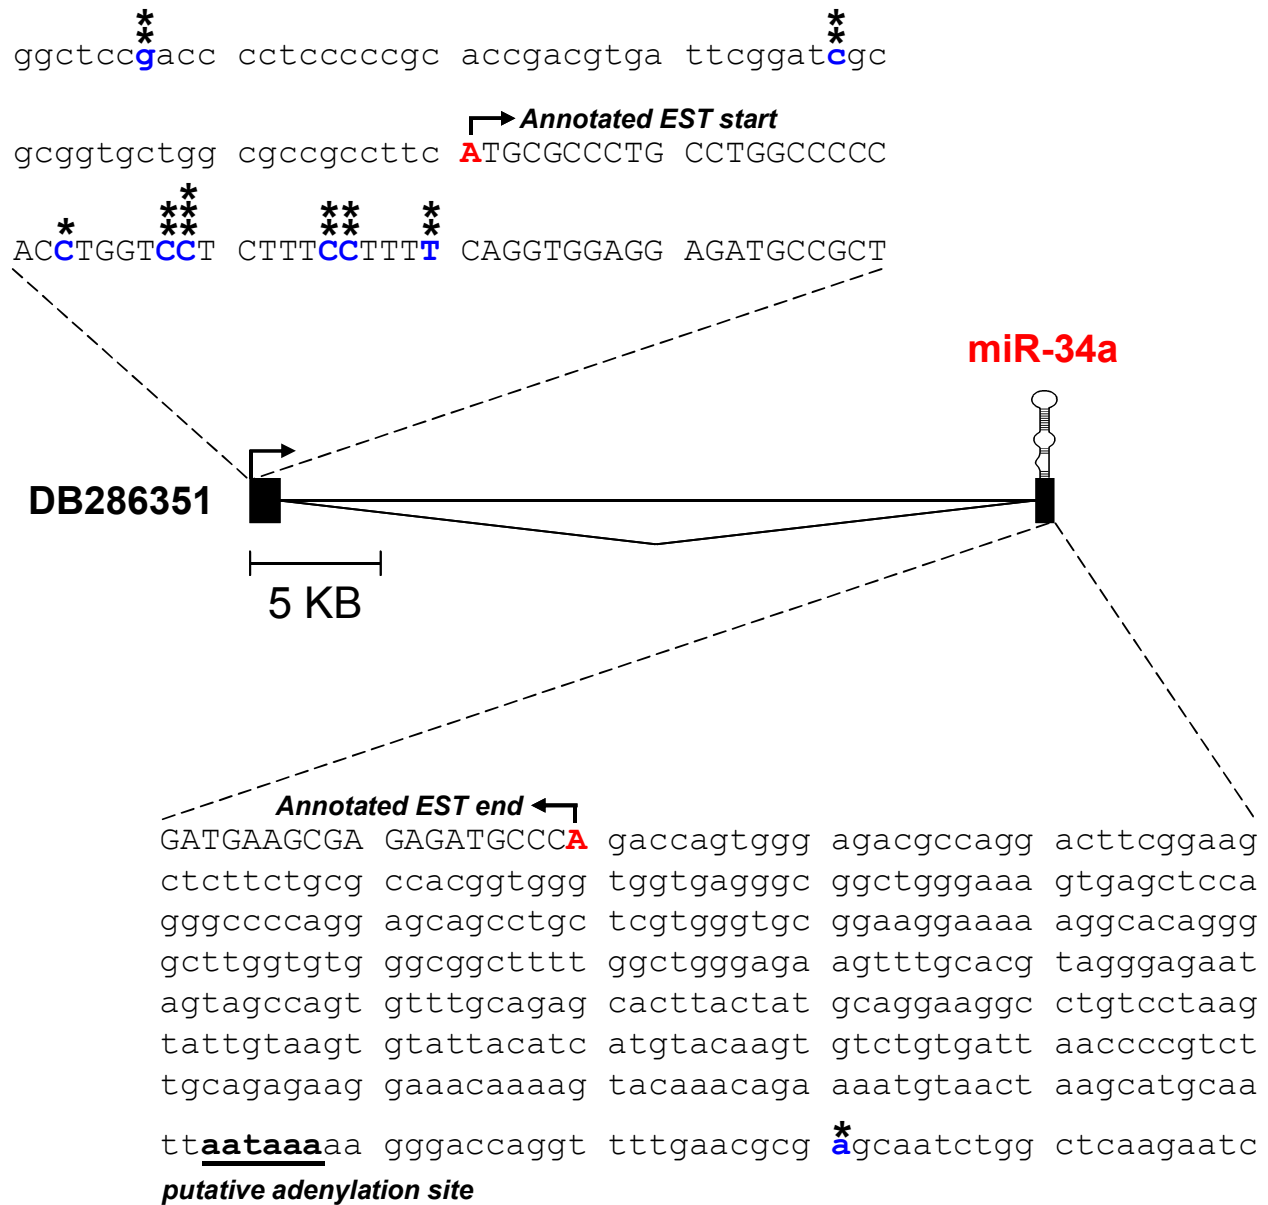

**Supplemental Figure 1. Characterization of the miR-34a primary transcript**  
 RACE was performed to map the 5' and 3' ends of human EST DB286351, which contains miR-34a. 5' RACE results are shown in the upper panel with each asterisk indicating the position of the 5' end of an individual RACE clone. 3' RACE results are depicted in the lower panel. All transcripts terminated at the nucleotide indicated with an asterisk.

## HEK293T

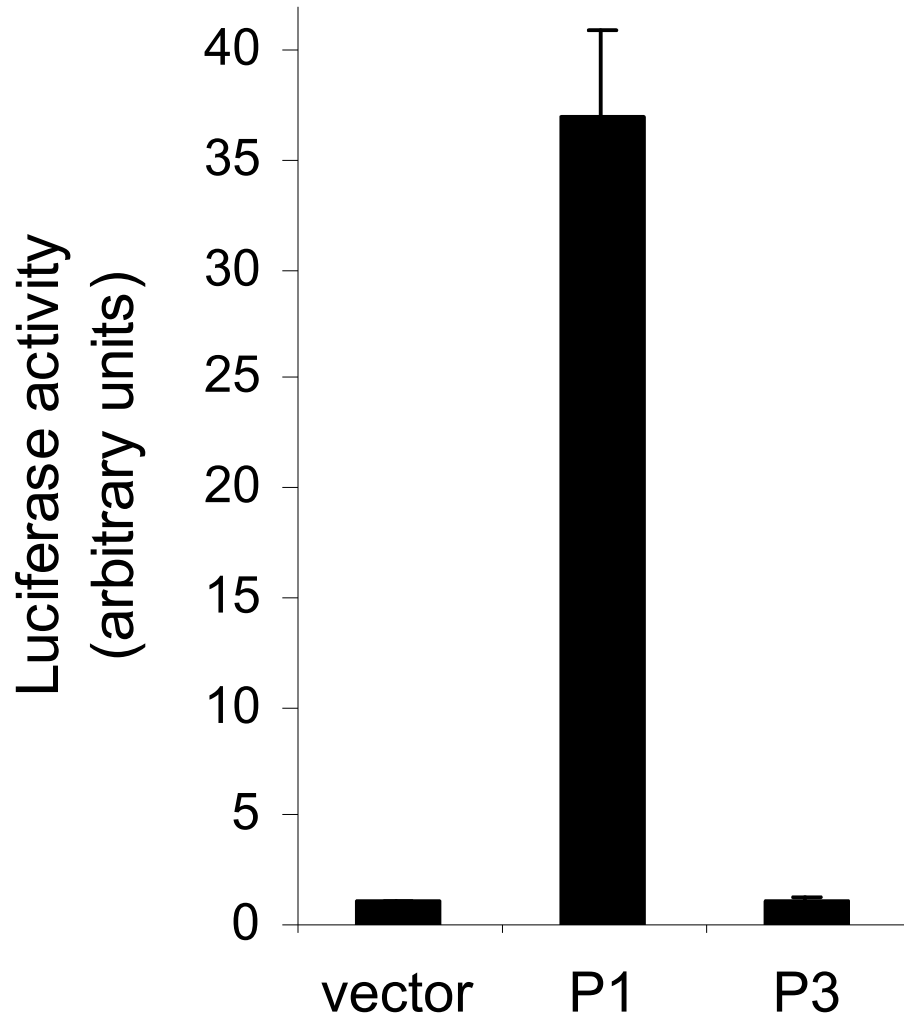

**Supplemental Figure 2. Activity of promoter constructs in HEK293T cells**  
Error bars represent standard deviations from three independent transfections each measured in triplicate.

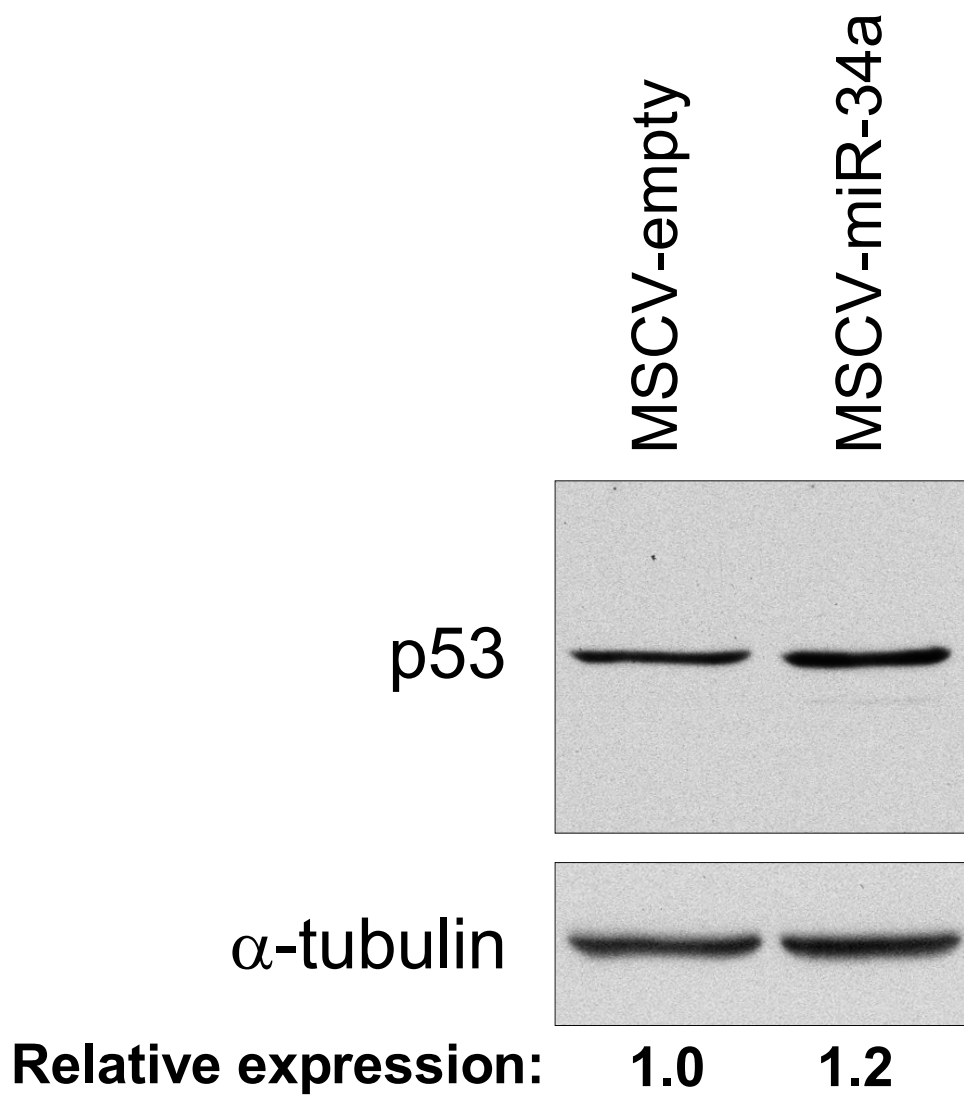

**Supplemental Figure 3.** Western blot showing p53 levels in retrovirally-infected cell populations.

**Supplemental Table 1. Genomic Alterations in Pancreatic Cancer Cell Lines**

| Cell line  | p53 status                   | 1p36 loss | miR-34a expression |
|------------|------------------------------|-----------|--------------------|
| BxPc3      | bi-allelic loss <sup>a</sup> |           | undetectable       |
| Panc 04.14 | WT <sup>b</sup>              | Yes       | 5-fold reduced     |
| MiaPaCa2   | bi-allelic loss <sup>a</sup> |           | undetectable       |
| Panc1      | bi-allelic loss <sup>a</sup> |           | undetectable       |
| Panc 08.13 | unknown                      | Yes       | undetectable       |
| PK8        | bi-allelic loss <sup>c</sup> |           | undetectable       |
| Panc02.03  | unknown                      |           | 3-fold reduced     |
| PK9        | bi-allelic loss <sup>c</sup> |           | 2-fold reduced     |
| Panc 02.13 | unknown                      | Yes       | undetectable       |
| AsPc1      | bi-allelic loss <sup>a</sup> |           | undetectable       |
| E3LZ10.7   | WT <sup>b</sup>              |           | undetectable       |
| CAPAN1     | bi-allelic loss <sup>a</sup> |           | 2-fold reduced     |
| Panc 06.03 | unknown                      |           | 10-fold reduced    |
| Su86.86    | bi-allelic loss <sup>a</sup> |           | 10-fold reduced    |
| L3.6PL     | bi-allelic loss <sup>d</sup> |           | 10-fold reduced    |

<sup>a</sup><http://pathology2.jhu.edu/pancreas/geneticsweb/Profiles.htm>; <sup>b</sup>unpublished observations

<sup>c</sup>Duda et al. (2002). Br. J. Ca. 86:490-496; <sup>d</sup>Keping Xie, personal communication

**Supplemental Table 3.**

**Primer sequences for miR-34a promoter cloning**

| <b>Amplicon</b>   | <b>Forward primer sequence<br/>(5'-3')</b> | <b>Reverse primer sequence<br/>(5'-3')</b> |
|-------------------|--------------------------------------------|--------------------------------------------|
| IRES              | ATACCGAGATCTGACCCCATGCATCGAATTCC           | ATACCGAGATCTTATCATCGTGTITTTTCAAAGG         |
| P1                | ATACCGCTCGAGCTTCCCTGTCTCTCTCTA             | ATACCGCTCGAGGAATCCTTTCTCCCCAGAG            |
| P2                | ATACCGCTCGAGCTTCCCTGTCTCTCTCTA             | ATACCGCTCGAGAGCAGGTAGTGCAGGCTTC            |
| P3                | ATACCGCTCGAGCTTCCCTGTCTCTCTCTA             | ATACCGCTCGAGATGAAGGCGGCGCCAGCA             |
| P4                | ATACCGCTCGAGCGCCCTGCCTGGCCCCAC             | ATACCGCTCGAGGAATCCTTTCTCCCCAGAG            |
| P5                | ATACCGCTCGAGCGCCCTGCCTGGCCCCAC             | ATACCGCTCGAGAGCAGGTAGTGCAGGCTTC            |
| P6                | ATACCGCTCGAGCCCCGTCCAGCATGCACC             | ATACCGCTCGAGGAATCCTTTCTCCCCAGAG            |
| P1 <sup>mut</sup> | GGCTCTGCCTGGGTTTACCTGGGTTTATTCCGAGCCGGGC   | GCCCGGCTCGGAATAAACCCAGGTAACCCAGGCAGAGCC    |

**Primer sequences for characterization of the miR-34a primary transcript**

| <b>Amplicon</b> | <b>Forward primer sequence<br/>(5'-3')</b> | <b>Reverse primer sequence<br/>(5'-3')</b> |
|-----------------|--------------------------------------------|--------------------------------------------|
| 5' RACE         | CGACTGGAGCACGAGGACACTGA                    | CGAGCAGGTAGTGCAGGCTTCCAG                   |
| 5' nested RACE  | GGACACTGACATGGACTGAAGGAGTA                 | CAAAATCTCAAATGCCCCCGATCT                   |
| 3' RACE         | ACCGGCCAGCTGTGAGTGTTCCTTT                  | GCTGTCAACGATACGCTACGTAACG                  |
| 3' nested RACE  | TGAGCAATAGTAAGGAAGCAATCAGCAA               | CGCTACGTAACGGCATGACAGTG                    |
| pri-miR-34a     | CCACCTGGTCCTCTTTCCTT                       | TTCAAACCTGGTCCCTTTTT                       |

**Primer sequences for cloning the miR-34a retrovirus**

| <b>miRNA</b> | <b>Forward primer sequence<br/>(5'-3')</b> | <b>Reverse primer sequence<br/>(5'-3')</b> |
|--------------|--------------------------------------------|--------------------------------------------|
| miR-34a      | ATACCGCTCGAGCCTCCTGCATCCTTTCTTT            | ATACCGCTCGAGCCTGTGCCTTTTCTCTCC             |

**Supplemental Table 2. Transcripts exhibiting altered expression in miR-34a-expressing cells**

Affymetrix gene expression profiling of HCT116  $p53^{WT}$  cells infected with empty virus or miR-34a virus was performed as described in Experimental Procedures. The fold change column indicates the level of expression in miR-34a-expressing cells relative to control cells.
